# Supplementary material
Source: MDPI journal article supplement (https://www.mdpi.com/2073-4352/10/3/223)
Supplement: s1 [file s1]

# Thermal and Photophysical Studies of Binary Mixtures of Liquid Crystal with Different Geometrical Mesogens

Omaima A. Alhaddad <sup>1,\*</sup>, Hoda A. Ahmed <sup>2</sup>, Mohamed Hagar <sup>3, 4,\*</sup>, Gamal R. Saad <sup>2</sup>, Khulood A. Abu Al-Ola <sup>1</sup>, and Magdi M. Naoum <sup>2</sup>

<sup>1</sup> Chemistry Department, College of Sciences, Al-Madina Al-Munawarah, Taibah University, Al-Madina 30002, Saudi Arabia; Kabualola@taibahu.edu.sa

<sup>2</sup> Faculty of Science, Department of Chemistry, Cairo University, Cairo 12613, Egypt; ahoda@sci.cu.edu.eg (H.A.A.); grsaad@sci.cu.edu.eg (G.R.S.); magdinaoum@yahoo.co.uk (M.M.N.)

<sup>3</sup> Faculty of Science, Chemistry Department, Alexandria University, Alexandria 21321, Egypt

<sup>4</sup> Chemistry Department, College of Sciences, Yanbu, Taibah University, Yanbu 30799 Saudi Arabia

\* Correspondence: OHADDAD@taibahu.edu.sa (O.A.A.); mohamedhagar@gmail.com (M.H.); Tel.: 00966508825877 (O.A.A.); +966545527958 (M.H.)

## 1. Synthesis of 4-(4-alkoxyphenylimino)methylphenyl-4-alkoxybenzoate In+m

A mixture of 0.01 mole 4-((4-alkoxyphenylimino)methyl)phenol and 4-alkoxybenzoic acid was dissolved in 25 ml dry methylene chloride. *N, N'*-dicyclohexylcarbodiimide (DCC, 0.02 mole) and catalytic amount of 4-dimethylaminopyridine (DMAP), were added. The reaction mixture was stirred for 72 hours at room temperature. Separated *N,N*-cyclohexylurea was filtered off and the filtrate was evaporated. The obtained product was recrystallized twice from ethanol to give TLC pure products [i].

## 2. Synthesis of 4-alkoxyphenylazo-4'-phenyl-4''-alkoxybenzoates II<sub>n+m</sub>

Molar equivalents of the 4-alkoxy phenylazo phenol (*Am*) and 4-*n*-alkoxybenzoic acid (*n* = 6, 8, 10, 12, 14, 16 carbons) were dissolved in dry methylene chloride. To the resulting solution, 2-molar equivalents of dicyclohexylcarbodiimide and few crystals of 4-(dimethylamino)-pyridine, as catalyst, were added and the solution left to stand for 72 hours at room temperature with stirring. The solid separated was then filtered off and the solution evaporated. The solid residue obtained was recrystallised twice from acetic acid and twice from ethanol to give TLC pure products, indicated by TLC as one clear spot in their TLC chromatogram and sharp melting [ii].

[i] Ahmed, H.; Hagar, M.; Saad, G., Impact of the proportionation of dialkoxy chain length on the mesophase behaviour of Schiff base/ester liquid crystals; experimental and theoretical study. *Liquid Crystals* **2019**, 1-10.

[ii] Ahmed, H.; Naoum, M.; Saad, G., Effect of alkoxy-chain length proportionation on the mesophase behaviour of terminally di-substituted phenylazo phenyl benzoates. *Liquid Crystals* **2013**, 40, (7), 914-921.
